# Supplementary material for: SARS-CoV-2 Spike Glycoprotein and ACE2 interaction reveals modulation of viral entry in wild and domestic animals
Source: bioRxiv or medRxiv preprint supplement (doi:10.1101/2020.05.08.084327), 2021-01-08
Supplement: Supplementary file [file media-3.pdf]

## 1. Interface Residue

```
> logit <- glm(Infection ~  
Interface_Residues,data=data,family="binomial")  
> summary(logit)
```

Call:

```
glm(formula = Infection ~ Interface_Residues, family = "binomial",  
data = data)
```

Deviance Residuals:

| Min     | 1Q      | Median | 3Q     | Max    |
|---------|---------|--------|--------|--------|
| -1.9904 | -0.3064 | 0.5155 | 0.5449 | 1.6819 |

Coefficients:

|                    | Estimate | Std. Error | z value | Pr(> z ) |
|--------------------|----------|------------|---------|----------|
| (Intercept)        | 9.43109  | 4.27345    | 2.207   | 0.0273 * |
| Interface_Residues | -0.11873 | 0.05901    | -2.012  | 0.0442 * |

---  
Signif. codes: 0 '\*\*\*' 0.001 '\*\*' 0.01 '\*' 0.05 '.' 0.1 ' ' 1

(Dispersion parameter for binomial family taken to be 1)

Null deviance: 20.597 on 16 degrees of freedom  
Residual deviance: 14.490 on 15 degrees of freedom  
AIC: 18.49

Number of Fisher Scoring iterations: 4

## 2. Van\_der\_Waals

```
logit <- glm(Infection ~ Van_der_Waals,data=data,family="binomial")  
> summary(logit)
```

Call:

```
glm(formula = Infection ~ Van_der_Waals, family = "binomial",  
data = data)
```

Deviance Residuals:

| Min     | 1Q      | Median | 3Q     | Max    |
|---------|---------|--------|--------|--------|
| -2.0717 | -0.5572 | 0.5199 | 0.5871 | 1.5431 |

Coefficients:

|               | Estimate | Std. Error | z value | Pr(> z ) |
|---------------|----------|------------|---------|----------|
| (Intercept)   | 11.2770  | 5.0152     | 2.249   | 0.0245 * |
| Van_der_Waals | 0.4294   | 0.2051     | 2.094   | 0.0363 * |

---  
Signif. codes: 0 '\*\*\*' 0.001 '\*\*' 0.01 '\*' 0.05 '.' 0.1 ' ' 1

(Dispersion parameter for binomial family taken to be 1)

Null deviance: 20.597 on 16 degrees of freedom  
Residual deviance: 14.697 on 15 degrees of freedom  
AIC: 18.697

Number of Fisher Scoring iterations: 4

### 3. Solvation polar

```
logit <- glm(Infection ~ Solvation_Polar,data=data,family="binomial")  
> summary(logit)
```

Call:

```
glm(formula = Infection ~ Solvation_Polar, family = "binomial",  
     data = data)
```

Deviance Residuals:

| Min     | 1Q      | Median | 3Q     | Max    |
|---------|---------|--------|--------|--------|
| -1.9850 | -0.6936 | 0.5269 | 0.5807 | 1.6541 |

Coefficients:

|                 | Estimate | Std. Error | z value | Pr(> z ) |
|-----------------|----------|------------|---------|----------|
| (Intercept)     | 7.48307  | 3.43071    | 2.181   | 0.0292 * |
| Solvation_Polar | -0.16464 | 0.08321    | -1.979  | 0.0479 * |

---

Signif. codes: 0 '\*\*\*' 0.001 '\*\*' 0.01 '\*' 0.05 '.' 0.1 ' ' 1

(Dispersion parameter for binomial family taken to be 1)

Null deviance: 20.597 on 16 degrees of freedom  
Residual deviance: 15.825 on 15 degrees of freedom  
AIC: 19.825

Number of Fisher Scoring iterations: 4

### 4. Solvation Hydrophobic

```
> logit <- glm(Infection ~  
Solvation_Hydrophobic,data=data,family="binomial")  
> summary(logit)
```

Call:

```
glm(formula = Infection ~ Solvation_Hydrophobic, family = "binomial",  
     data = data)
```

Deviance Residuals:

| Min     | 1Q      | Median | 3Q     | Max    |
|---------|---------|--------|--------|--------|
| -1.9205 | -0.3092 | 0.4363 | 0.4680 | 1.6999 |

Coefficients:

|                       | Estimate | Std. Error | z value | Pr(> z ) |
|-----------------------|----------|------------|---------|----------|
| (Intercept)           | 14.6096  | 6.2208     | 2.349   | 0.0188 * |
| Solvation_Hydrophobic | 0.4715   | 0.2139     | 2.204   | 0.0275 * |

---  
Signif. codes: 0 '\*\*\*' 0.001 '\*\*' 0.01 '\*' 0.05 '.' 0.1 ' ' 1

(Dispersion parameter for binomial family taken to be 1)

Null deviance: 20.597 on 16 degrees of freedom  
Residual deviance: 11.700 on 15 degrees of freedom  
AIC: 15.7

Number of Fisher Scoring iterations: 5

### 5. Entropy sidechain

```
> logit <- glm(Infection ~  
Entropy_sidechain, data=data, family="binomial")  
> summary(logit)
```

Call:

```
glm(formula = Infection ~ Entropy_sidechain, family = "binomial",  
data = data)
```

Deviance Residuals:

| Min     | 1Q      | Median | 3Q     | Max    |
|---------|---------|--------|--------|--------|
| -1.7086 | -0.3302 | 0.3950 | 0.4588 | 1.8552 |

Coefficients:

|                   | Estimate | Std. Error | z value | Pr(> z ) |
|-------------------|----------|------------|---------|----------|
| (Intercept)       | 6.5753   | 2.6721     | 2.461   | 0.0139 * |
| Entropy_sidechain | -0.5896  | 0.2664     | -2.214  | 0.0269 * |

---  
Signif. codes: 0 '\*\*\*' 0.001 '\*\*' 0.01 '\*' 0.05 '.' 0.1 ' ' 1

(Dispersion parameter for binomial family taken to be 1)

Null deviance: 20.597 on 16 degrees of freedom  
Residual deviance: 12.444 on 15 degrees of freedom  
AIC: 16.444

Number of Fisher Scoring iterations: 5
