# Supplementary material for: SARS-CoV-2 Spike Glycoprotein and ACE2 interaction reveals modulation of viral entry in wild and domestic animals
Source: bioRxiv or medRxiv preprint supplement (doi:10.1101/2020.05.08.084327), 2021-01-08
Supplement: Supplementary file [file media-4.pdf]

## Model for prediction of probability of viral entry

*Note:- When all the parameters were considered the glm logistic regression converged with Interaction energy, entropy side chain and entropy main chain as independent variables.*

```
> logit <- glm(Infection ~ Interaction_Energy
+entropy_mainchain+Entropy_sidechain,data=data,family="binomial"
)
> summary(logit)
```

Call:

```
glm(formula = Infection ~ Interaction_Energy + entropy_mainchain
+
Entropy_sidechain, family = "binomial", data = data)
```

Deviance Residuals:

| Min      | 1Q       | Median  | 3Q      | Max     |
|----------|----------|---------|---------|---------|
| -1.46547 | -0.00002 | 0.01061 | 0.02567 | 1.20598 |

Coefficients:

|                    | Estimate  | Std. Error | z value | Pr(> z ) |     |
|--------------------|-----------|------------|---------|----------|-----|
| (Intercept)        | -89.65044 | 16.70336   | -5.367  | 8.00e-08 | *** |
| Interaction_Energy | -0.19841  | 0.08769    | -2.263  | 0.0237   | *   |
| entropy_mainchain  | 9.04423   | 1.53148    | 5.906   | 3.51e-09 | *** |
| Entropy_sidechain  | 1.06761   | 0.56215    | 1.899   | 0.0575   | .   |

---  
Signif. codes: 0 '\*\*\*' 0.001 '\*\*' 0.01 '\*' 0.05 '.' 0.1 ' ' 1

(Dispersion parameter for binomial family taken to be 1)

Null deviance: 1235.83 on 1019 degrees of freedom  
Residual deviance: 237.73 on 1016 degrees of freedom  
AIC: 245.73

Number of Fisher Scoring iterations: 9

```
> r2Log(logit)
[1] 0.8076323
```

- *Hosmer and Lemeshow goodness of fit (GOF) test*

```
> hoslem.test(data$Infection, fitted(logit))
```

```
data: data$Infection, fitted(logit)
```

X-squared = 13.686, df = 8, p-value = 0.09034

- Test for significant reduction in null deviance on inclusion of the three parameters – Interaction\_Energy + Entropy\_sidechain + entropy\_mainchain

```
> 1-pchisq(1235.83-237.73,1019-1016)
[1] 0
```
